# Supplementary material for: First-Trimester Use of Selective Serotonin-Reuptake Inhibitors and the Risk of Birth Defects
Source: Atypon-hosted journal article supplement (doi:10.1056/nejmoa067407), 2007-06-27
Supplement: nejm_louik_2675sa1.pdf [file nejm_louik_2675sa1.pdf]

## Supplementary Appendix

This appendix has been provided by the authors to give readers additional information about their work.

Supplement to: Louik C, Lin AE, Werler MM, Hernández-Díaz S, Mitchell AA. First-trimester use of selective serotonin-reuptake inhibitors and the risk of birth defects. *N Engl J Med* 2007;356:2675-83.

**Web-Only Supplement: Heart Defect Codes**

**I. Situs Anomalies and Looping Defects**

Situs inversus totalis, heterotaxy  
Asplenia  
Accessory spleen  
Corrected transposition of the great arteries/L-transposition of the great arteries (TGA)  
Ventricular inversion  
Common or single ventricle  
Double inlet left ventricle  
Double inlet right ventricle

**II. Conotruncal and Major Arch Anomalies**

Truncus arteriosus/persistent truncus  
d-Transposition great arteries (d-TGA)  
Transposition great vessels nos  
Transposition great arteries, complete  
Taussig-Bing Syndrome/double outlet right ventricle  
Tetralogy of Fallot  
Tetralogy of Fallot with atrial septal defect  
Pseudotruncus (tetralogy of Fallot with pulmonary atresia)  
Conoventricular ventricular septal defect  
Vascular ring  
Double aortic arch  
Interrupted aortic arch

**III. Septal Defects**

VSD—supracristal, subarterial, type I  
VSD—perimembranous, type II  
VSD—muscular, type IV  
Multiple VSDs  
VSD nos  
Atrial septal defect (ASD), secundum type  
Auricular septal defect nos  
ASD, other specified  
ASD nos

**IV. AV Canal, AV Septal Defects**

Common atrioventricular (AV) canal  
Atrioventricular septal defect  
Complete AV septal defect  
Common atrioventricular (AV) canal-type VSD  
VSD inflow, canal-type, type III  
Incomplete AV canal  
ASD primum type  
Common atrium  
Other endocardial cushion defect  
Endocardial cushion defect nos

**V. Right Ventricular Outflow Tract Obstruction**

- Pulmonary valve absent or atresia
- Pulmonary valve stenosis or narrowing
- Other pulmonary valve anomalies
- Tricuspid valve stenosis or narrowing
- Tricuspid valve atresia or narrowing
- Tricuspid valve atresia or stenosis nos
- Other tricuspid valve anomalies/hypoplasia tricuspid valve
- Ebstein anomaly
- Pulmonary infundibular (subvalvular) stenosis
- Pulmonary artery stenosis or narrowing
- Pulmonary artery atresia or absence
- Pulmonary artery atresia or stenosis, nos
- Pulmonary artery stenosis /with VSD
- Pulmonary artery atresia /with VSD, not Tetralogy type
- Pulmonary artery atresia/stenosis nos / with VSD

**VI. Left Ventricular Outflow Tract Obstruction**

- Aortic valve stenosis or narrowing
- Aortic valve atresia or absent
- Aortic valve atresia/stenosis nos
- Subaortic stenosis
- Other aortic valve anomalies/ hypoplasia aortic valve
- Mitral valve stenosis or narrowing
- Mitral valve atresia or absence
- Mitral valve atresia/stenosis nos
- Other mitral valve anomalies
- Hypoplastic left heart syndrome
- Cor triatriatum
- Shone's complex
- Preductal coarctation aorta
- Postductal coarctation aorta
- Juxtaductal coarctation aorta
- Coarctation aorta with VSD
- Coarctation aorta nos
- Other coarctation aorta
- Aorta stenosis or narrowing
- Aorta atresia, stenosis nos
- Aorta hypoplasia, tubular hypoplasia aorta
- Supra-aortic stenosis

**VII. Anomalous Pulmonary Venous Return**

- Total anomalous pulmonary venous return
- Partial anomalous pulmonary venous return
